# Supplementary material
Source: PubMed Central journal article supplement (PMC5368595)
Supplement: mmc1.pdf [file mmc1.pdf]

YMTHE, Volume 25

## **Supplemental Information**

**rAAV8-733-Mediated Gene Transfer of CHIP/Stub-1**

**Prevents Hippocampal Neuronal Death**

**in Experimental Brain Ischemia**

**Felipe Cabral-Miranda, Elisa Nicoloso-Simões, Juliana Adão-Novaes, Vince Chiodo, William W. Hauswirth, Rafael Linden, Luciana Barreto Chiarini, and Hilda Petrs-Silva**

Figure S1

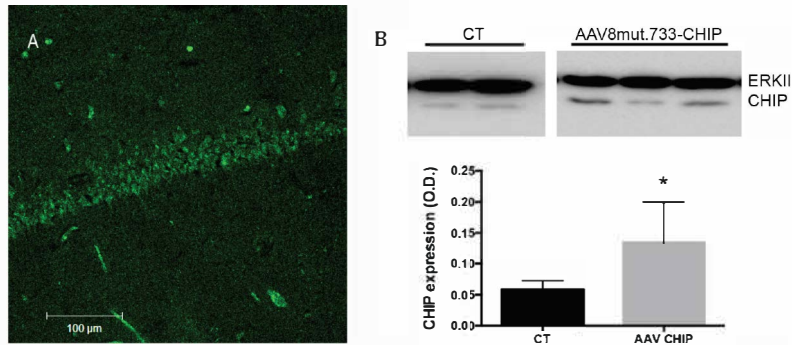

Figure S1. Trans gene expression mediated by rAAV8-733 in the hippocampus. (A) Immunofluorescence for GFP shows its distribution after 3 weeks of infection with rAAV8-733GFP in CA1. (B) Western Blot of whole hippocampus homogenates indicates its overexpression after 3 weeks following rAAV-8-733-CHIP infection. Samples CT=controls, rAAV8-733-CHIP=rAAV8-733-CHIP infected. ERK-2 was used as loading control.  $P < 0.05$ , C.I.:95%; Unpaired Student's t-test was used for statistical inference.

Figure S2

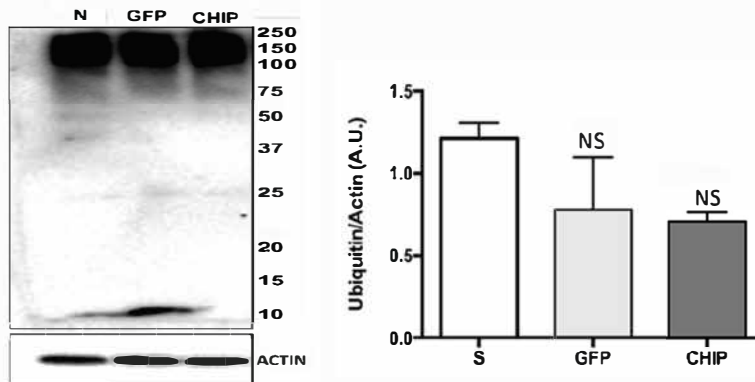

Figure S2. rAAV8-733 infection does not alter the proportion of ubiquitinated proteins. Western Blot for ubiquitin shows no significant alteration between sham operated groups infected with rAAV8-733-GFP, rAAV8-733-CHIP or non-infected.
